# Supplementary material for: Development of indicators for avoidable emergency medical service calls by mapping paramedic clinical impression codes to ambulatory care sensitive conditions and mental health conditions in the UK and Canada
Source: PubMed Central journal article supplement — BMJ Open. 2023 Dec 12;13(12):e073520. doi: 10.1136/bmjopen-2023-073520 (PMC10729076; doi:10.1136/bmjopen-2023-073520), 2023-12-12
Supplement: bmjopen-2023-073520supp001.pdf [file bmjopen-2023-073520supp001.pdf]

**Supplementary File 1****Table S1. Clinical Impression Codes available to paramedics in Ontario, Canada and the United Kingdom**

| Ontario Problem Codes                                                                                                                                                                                                                                                                                                                                     | UK Clinical Impression Codes                                                                                                                                                                                                                                                                                    |
|-----------------------------------------------------------------------------------------------------------------------------------------------------------------------------------------------------------------------------------------------------------------------------------------------------------------------------------------------------------|-----------------------------------------------------------------------------------------------------------------------------------------------------------------------------------------------------------------------------------------------------------------------------------------------------------------|
| Vital Signs Absent<br>1: Cardiac/Medical<br>2: Traumatic                                                                                                                                                                                                                                                                                                  | Injury Trauma<br>Gunshot<br>Abdominal Injury                                                                                                                                                                                                                                                                    |
| Airway<br>11: Obstruction<br>(Partial/Complete)                                                                                                                                                                                                                                                                                                           | Near Drowning<br>Explosive / Blast Injury<br>Stab Wound                                                                                                                                                                                                                                                         |
| Breathing<br>21: Dyspnea<br>24: Respiratory Arrest                                                                                                                                                                                                                                                                                                        | Limb Injury<br>Penetrating Trauma<br>Head Injury                                                                                                                                                                                                                                                                |
| Circulation<br>31: Hemorrhage<br>33: Hypotension<br>34: Suspected sepsis                                                                                                                                                                                                                                                                                  | Neck Injury<br>Smoke Inhalation<br>Diving Incident<br>Fall Non - Injury                                                                                                                                                                                                                                         |
| Neurological<br>40: Traumatic Brain Injury<br>41: Stroke / TIA<br>42: Temporary Loss of<br>Consciousness<br>43: Altered Level of<br>Consciousness<br>44: Headache<br>45: Behaviour / Psychiatric<br>45.01: Excited Delirium<br>46: Active Seizure<br>47: Paralysis / Spinal Trauma<br>48: Confusion / Disorientation<br>49: Unconscious<br>50: Post-ictal | Chest Injury<br>Thermal Injury<br>Back Injury<br>Carbon Monoxide Poisoning<br>Drowning<br>Electrocution<br>Chemical Exposure<br>Multi-System Trauma<br>Cold Exposure<br>CBRNE Incident<br>Back Pain Non-Traumatic<br>Unintentional Overdose<br>Alleged Assault<br>Soft Tissue Injury<br>Suspected Neck of Femur |
| Cardiac<br>51: Ischemic<br>53: Palpitations<br>54: Pulmonary Edema<br>55: Post Arrest<br>56: Cardiogenic Shock<br>57: STEMI<br>58: Hyperkalemia                                                                                                                                                                                                           | Gastrointestinal<br>Acute Abdominal Problem<br>Constipation<br>Diarrhea & Vomiting<br>Gastrointestinal Bleed<br>Other Abdominal Problem                                                                                                                                                                         |
| Non-Traumatic<br>60: Non Ischemic Chest Pain<br>61: Abdominal / Pelvic /<br>Perineal / Rectal Pain<br>62: Back Pain                                                                                                                                                                                                                                       | Urinary<br>Urinary Problem<br>Urinary Tract Infection<br>Catheter Problem<br>Allergic<br>Allergic Reaction<br>Bite / Sting<br>Neurological/stroke<br>Faint<br>Collapse Unknown Cause<br>Collapse ? Cause                                                                                                        |

|                                                                                                                                                                                                                                                                                                                                                                                                                                                                                                                                                                                                                                                                                                                                                                                                                                                                                                                                                    |                                                                                                                                                                                                                                                                                                                                                                                                                                                                                                                                                                                                                                                                                                                                                                                                                                                                                                                                                                                                                                                                                                                         |
|----------------------------------------------------------------------------------------------------------------------------------------------------------------------------------------------------------------------------------------------------------------------------------------------------------------------------------------------------------------------------------------------------------------------------------------------------------------------------------------------------------------------------------------------------------------------------------------------------------------------------------------------------------------------------------------------------------------------------------------------------------------------------------------------------------------------------------------------------------------------------------------------------------------------------------------------------|-------------------------------------------------------------------------------------------------------------------------------------------------------------------------------------------------------------------------------------------------------------------------------------------------------------------------------------------------------------------------------------------------------------------------------------------------------------------------------------------------------------------------------------------------------------------------------------------------------------------------------------------------------------------------------------------------------------------------------------------------------------------------------------------------------------------------------------------------------------------------------------------------------------------------------------------------------------------------------------------------------------------------------------------------------------------------------------------------------------------------|
| <p>Gastrointestinal<br/>63: Nausea/ Vomiting/ Diarrhea</p> <p>Musculoskeletal/Trauma<br/>66: Musculoskeletal<br/>67: Trauma / Injury</p> <p>Obstetrical/Gynecological<br/>71: Obstetrical Emergency<br/>72: Gynecological Emergency<br/>73: Newborn / Neonatal</p> <p>Endocrine/Toxicological<br/>81: Drug / Alcohol Overdose<br/>81.1: Suspected Opioid<br/>Overdose<br/>82: Poisoning / Toxic Exposure<br/>83: Diabetic Emergency<br/>84: Allergic Reaction<br/>85: Anaphylaxis<br/>86: Adrenal Crisis</p> <p>General and Minor<br/>87: Novel Medications<br/>88: Home Medical Technology<br/>89: Lift Assist<br/>90: Inter-facility Transfer<br/>91: Environmental Emergency<br/>92: Weakness / Dizziness /<br/>Unwell<br/>93: Treatment / Diagnosis &amp;<br/>Return<br/>94: Convalescent / Invalid /<br/>Return Home<br/>95: Infectious Disease<br/>96: Organ Retrieval / Transfer<br/>98: Organ Recipient<br/>99: Other Medical / Trauma</p> | <p>Convulsion<br/>Other Neurological Problem<br/>Febrile Convulsion<br/>Confusion<br/>Chronic Neurological Problem<br/>Headache<br/>Meningitis<br/>Faint/Dizziness<br/>Obstetric or gynaecological<br/>Ectopic Pregnancy</p> <p>Other Gynae Problem<br/>Eclampsia<br/>Chronic Gynae Problem<br/>Other Obstetric Problem<br/>New Born Infant<br/>Delivery Complication<br/>Antepartum Haemorrhage<br/>Miscarriage<br/>Postpartum Haemorrhage<br/>Pre-eclampsia<br/>In Labour<br/>PV Bleed<br/>Baby Delivered</p> <p>Non-specific<br/>Other Medical Problem<br/>Unknown Problem<br/>Transport Only<br/>No Apparent Problem</p> <p>Cardiovascular<br/>Arrhythmia / Palpitations<br/>ECG Confirmed ST Segment<br/>Elevated MI<br/>Cardiac Problem<br/>Cardiac Arrest<br/>DVT<br/>Cardiac Chest Pain<br/>AAA ([ruptured] abdominal aorti<br/>aneurysm)<br/>Ischaemic Limb<br/>Heart Failure<br/>Suspected PE<br/>TIA<br/>Stroke<br/>Sickle Cell Crisis<br/>Chest Pain Non-Cardiac</p> <p>Respiratory<br/>COPD<br/>Other Respiratory Problem<br/>Chest Infection<br/>Choking<br/>Asthma<br/>Influenza</p> <p>Psychosocial</p> |
|----------------------------------------------------------------------------------------------------------------------------------------------------------------------------------------------------------------------------------------------------------------------------------------------------------------------------------------------------------------------------------------------------------------------------------------------------------------------------------------------------------------------------------------------------------------------------------------------------------------------------------------------------------------------------------------------------------------------------------------------------------------------------------------------------------------------------------------------------------------------------------------------------------------------------------------------------|-------------------------------------------------------------------------------------------------------------------------------------------------------------------------------------------------------------------------------------------------------------------------------------------------------------------------------------------------------------------------------------------------------------------------------------------------------------------------------------------------------------------------------------------------------------------------------------------------------------------------------------------------------------------------------------------------------------------------------------------------------------------------------------------------------------------------------------------------------------------------------------------------------------------------------------------------------------------------------------------------------------------------------------------------------------------------------------------------------------------------|

|  |                                                                                                                                                                                                                                                                                                                                                                                                                                                                                                                                                                                                                                                                                                                                                                                                                                                                                                           |
|--|-----------------------------------------------------------------------------------------------------------------------------------------------------------------------------------------------------------------------------------------------------------------------------------------------------------------------------------------------------------------------------------------------------------------------------------------------------------------------------------------------------------------------------------------------------------------------------------------------------------------------------------------------------------------------------------------------------------------------------------------------------------------------------------------------------------------------------------------------------------------------------------------------------------|
|  | <ul style="list-style-type: none"><li>Attempted Suicide</li><li>Intentional Drug Overdose</li><li>DOLS (Deprivation of Liberty Safeguards)</li><li>Anxiety</li><li>Psychosis</li><li>Effects of Alcohol</li><li>Social Problem</li><li>Under MHA Section</li><li>Accidental Overdose / Poisoning</li><li>Depression</li><li>Panic / Anxiety Attack</li><li>Other Mental Health Problem</li><li>Dementia</li><li>Query Intoxicated</li><li>ENT/ophthalmological</li><li>Dental Problem</li><li>Other ENT Problem</li><li>Eye Problem</li><li>Epistaxis</li><li>Infections</li><li>Sepsis</li><li>Pyrexia Unknown Origin</li><li>Other Infection</li><li>Hyperthermia</li><li>Palliative care/frailty</li><li>Palliative Terminal Care</li><li>Off Legs / Poor Mobility</li><li>Endocrine</li><li>Hyperglycaemia</li><li>Hypoglycaemia</li><li>Other Diabetic Problem</li><li>Endocrine Emergency</li></ul> |
|--|-----------------------------------------------------------------------------------------------------------------------------------------------------------------------------------------------------------------------------------------------------------------------------------------------------------------------------------------------------------------------------------------------------------------------------------------------------------------------------------------------------------------------------------------------------------------------------------------------------------------------------------------------------------------------------------------------------------------------------------------------------------------------------------------------------------------------------------------------------------------------------------------------------------|

|  |  |
|--|--|
|  |  |
|--|--|
