# Supplementary material for: Development of indicators for avoidable emergency medical service calls by mapping paramedic clinical impression codes to ambulatory care sensitive conditions and mental health conditions in the UK and Canada
Source: PubMed Central journal article supplement — BMJ Open. 2023 Dec 12;13(12):e073520. doi: 10.1136/bmjopen-2023-073520 (PMC10729076; doi:10.1136/bmjopen-2023-073520), 2023-12-12
Supplement: bmjopen-2023-073520supp002.pdf [file bmjopen-2023-073520supp002.pdf]

## Supplementary File 2

Table S2. Paramedic Impression Codes Mapped to Ambulatory Care Sensitive Conditions

| ACSC variable   | Ontario Codes                                                                                                                                                                                                           |                                                                                                                                 |                        | UK Codes                                                  |                                                           |                                                           | Final Codes for Use    |                                                           |
|-----------------|-------------------------------------------------------------------------------------------------------------------------------------------------------------------------------------------------------------------------|---------------------------------------------------------------------------------------------------------------------------------|------------------------|-----------------------------------------------------------|-----------------------------------------------------------|-----------------------------------------------------------|------------------------|-----------------------------------------------------------|
|                 | Paramedic-supplied                                                                                                                                                                                                      | Physician-supplied                                                                                                              | Combined/Corroborated  | Paramedic-supplied                                        | Physician-supplied                                        | Combined/Corroborated                                     | Ontario                | UK                                                        |
| <b>Diabetes</b> | 83: Diabetic Emergency<br><u>Alternate:</u><br>41: Stroke/TIA<br>43: Altered Level of Consciousness<br>48: Confusion/Disorientation<br>49: Unconscious<br>63: Nausea/Vomiting/Diarrhea<br>92: Weakness/Dizziness/Unwell | 83: Diabetic Emergency<br>42: Temporary Loss of Consciousness<br>63: Nausea/Vomiting/ Diarrhea<br>92: Weakness/Dizziness/Unwell | 83: Diabetic Emergency | Hyperglycaemia<br>Hypoglycaemia<br>Other Diabetic Problem | Hyperglycaemia<br>Hypoglycaemia<br>Other Diabetic Problem | Hyperglycaemia<br>Hypoglycaemia<br>Other Diabetic Problem | 83: Diabetic Emergency | Hyperglycaemia<br>Hypoglycaemia<br>Other Diabetic Problem |
| <b>COPD</b>     | 21: Dyspnea<br><u>Alternate:</u><br>24: Respiratory Arrest                                                                                                                                                              | 21: Dyspnea<br>42: Temporary Loss of Consciousness<br>60: Non Ischemic Chest Pain<br>92: Weakness/Dizziness/Unwell              | 21: Dyspnea            | COPD                                                      | COPD                                                      | COPD                                                      | 21: Dyspnea            | COPD                                                      |
| <b>Asthma</b>   | 21: Dyspnea<br><u>Alternate:</u><br>24: Respiratory Arrest                                                                                                                                                              | 21: Dyspnea<br>42: Temporary Loss of Consciousness<br>60: Non Ischemic Chest Pain<br>92: Weakness/                              | 21: Dyspnea            | Asthma                                                    | Asthma                                                    | Asthma                                                    | 21: Dyspnea            | Asthma                                                    |

|                                                  |                                                                                                                                                                                            |                                                                                                                                                                                                                 |                                      |                     |                                                                               |                                                                               |                                      |                                                                               |
|--------------------------------------------------|--------------------------------------------------------------------------------------------------------------------------------------------------------------------------------------------|-----------------------------------------------------------------------------------------------------------------------------------------------------------------------------------------------------------------|--------------------------------------|---------------------|-------------------------------------------------------------------------------|-------------------------------------------------------------------------------|--------------------------------------|-------------------------------------------------------------------------------|
|                                                  |                                                                                                                                                                                            | Dizziness/Unwell                                                                                                                                                                                                |                                      |                     |                                                                               |                                                                               |                                      |                                                                               |
| <b>Angina</b>                                    | 51: Ischemic<br><u>Alternate:</u><br>53: Palpitations<br>55: Post Arrest<br>56: Cardiogenic Shock<br>57: STEMI<br>61: Abdominal/<br>Pelvic/Perineal/<br>Rectal Pain                        | 21: Dyspnea<br>51: Ischemic<br>92: Weakness/<br>Dizziness/Unwell                                                                                                                                                | 51: Ischemic                         | Cardiac Chest Pain  | ECG Confirmed ST Segment Elevated MI<br>Cardiac Problem<br>Cardiac Chest Pain | ECG Confirmed ST Segment Elevated MI<br>Cardiac Problem<br>Cardiac Chest Pain | 51: Ischemic<br>57: STEMI            | ECG Confirmed ST Segment Elevated MI<br>Cardiac Problem<br>Cardiac Chest Pain |
| <b>Grand Mal and other epileptic convulsions</b> | 46: Active Seizure<br><u>Alternate:</u><br>42: Temporary Loss of Consciousness<br>43: Altered Level of Consciousness<br>48: Confusion /Disorientation<br>49: Unconscious<br>50: Post-ictal | 46: Active Seizure<br>50: Post-ictal<br>42: Temporary Loss of Consciousness<br>44: Headache<br>45: Behaviour/ Psychiatric<br>48: Confusion/ Disorientation<br>89: Lift Assist<br>92: Weakness/ Dizziness/Unwell | 46: Active Seizure<br>50: Post-ictal | Convulsion Epilepsy | Convulsion Epilepsy                                                           | Convulsion Epilepsy                                                           | 46: Active Seizure<br>50: Post-ictal | Convulsion Epilepsy                                                           |
| <b>HF and Pulm Edema</b>                         | 54: Pulmonary Edema<br><u>Alternate:</u><br>24: Respiratory Arrest<br>51: Ischemic<br>55: Post Arrest<br>56: Cardiogenic Shock<br>57: STEMI                                                | 21: Dyspnea<br>54: Pulmonary Edema<br>60: Non Ischemic Chest Pain<br>92: Weakness/ Dizziness/ Unwell                                                                                                            | 54: Pulmonary Edema                  | Heart Failure       | Heart Failure                                                                 | Heart Failure                                                                 | 54: Pulmonary Edema                  | Heart Failure                                                                 |

|                                                          |                                                                                                                                                         |                                                                                                                                                                                                                                      |                            |                                                                                                                |                                                                                                                |                                                                                                                |                                                             |                                                                                                                |
|----------------------------------------------------------|---------------------------------------------------------------------------------------------------------------------------------------------------------|--------------------------------------------------------------------------------------------------------------------------------------------------------------------------------------------------------------------------------------|----------------------------|----------------------------------------------------------------------------------------------------------------|----------------------------------------------------------------------------------------------------------------|----------------------------------------------------------------------------------------------------------------|-------------------------------------------------------------|----------------------------------------------------------------------------------------------------------------|
| <b>Hypertension</b>                                      | 99: Other Medical/Trauma<br><u>Alternate:</u><br>41: Stroke/TIA<br>44: Headache<br>51: Ischemic<br>53: Palpitations<br>54: Pulmonary Edema<br>57: STEMI | 44: Headache<br>92: Weakness/Dizziness/ Unwell<br>99: Other Medical/Trauma                                                                                                                                                           | No code available          | None                                                                                                           | None                                                                                                           | No code available                                                                                              | No code available                                           | No code available                                                                                              |
| <b>Lower Respiratory</b>                                 | 21: Dyspnea<br><u>Alternate:</u><br>24: Respiratory Arrest                                                                                              | 21: Dyspnea<br>33: Hypotension<br>42: Temporary Loss of Consciousness<br>60: Non Ischemic Chest Pain<br>92: Weakness/Dizziness/ Unwell                                                                                               | 21: Dyspnea                | Chest infection                                                                                                | Chest infection                                                                                                | Chest Infection                                                                                                | 21: Dyspnea                                                 | Chest Infection                                                                                                |
| <b>Mental Health - anxiety, depression, panic attack</b> | 45: Behaviour/ Psychiatric<br><u>Alternate:</u><br>43: Altered Level of Consciousness<br>53: Palpitations                                               | 21: Dyspnea<br>45: Behaviour/ Psychiatric<br>42: Temporary Loss of Consciousness<br>44: Headache<br>48: Confusion/ Disorientation<br>60: Non Ischemic Chest Pain<br>63: Nausea/ Vomiting/ Diarrhea<br>92: Weakness/Dizziness/ Unwell | 45: Behaviour/ Psychiatric | Attempted Suicide<br>Intentional Drug Overdose<br>Anxiety<br>Psychosis<br>Depression<br>Panic / Anxiety Attack | Attempted Suicide<br>Intentional Drug Overdose<br>Anxiety<br>Psychosis<br>Depression<br>Panic / Anxiety Attack | Attempted Suicide<br>Intentional Drug Overdose<br>Anxiety<br>Psychosis<br>Depression<br>Panic / Anxiety Attack | 45: Behaviour/ Psychiatric<br>81: Intentional drug overdose | Attempted Suicide<br>Intentional Drug Overdose<br>Anxiety<br>Psychosis<br>Depression<br>Panic / Anxiety Attack |

|  |  |                                              |  |  |  |  |  |  |
|--|--|----------------------------------------------|--|--|--|--|--|--|
|  |  | 89: Lift Assist<br>45.01 Excited<br>Delirium |  |  |  |  |  |  |
|--|--|----------------------------------------------|--|--|--|--|--|--|

Notes: COPD = chronic obstructive pulmonary disease; ECG = electrocardiogram; MI = myocardial infarction; ST Elevation = elevation of the ST segment on an electrocardiogram; STEMI = ST elevation myocardial infarction; TIA = transient ischemic attack
